# Supplementary material for: Free D-amino acids produced by commensal bacteria in the colonic lumen
Source: PubMed Central journal article supplement (PMC6297366; doi:10.1038/s41598-018-36244-z), 2018-12-17
Supplement: 41598_2018_36244_MOESM1_ESM.pdf [file 41598_2018_36244_MOESM1_ESM.pdf]

# Supplementary Information

## Free D-amino acids produced by commensal bacteria in the colonic lumen

Mitsuharu Matsumoto<sup>1\*</sup>, Akihiro Kunisawa<sup>2,3</sup>, Takanari Hattori<sup>2,3</sup>, Shuichi Kawana<sup>2</sup>, Yusuke Kitada<sup>1</sup>, Hazuki Tamada<sup>1</sup>, Shinichi Kawano<sup>2,3</sup>, Yoshihiro Hayakawa<sup>2</sup>, Junko Iida<sup>2,3</sup>, Eiichiro Fukusaki<sup>3,4\*</sup>

<sup>1</sup> Dairy Science and Technology Institute, Kyodo Milk Industry Co. Ltd., Tokyo, Japan

<sup>2</sup> Shimadzu Corporation, Kyoto, Japan

<sup>3</sup> Osaka University Shimadzu Analytical Innovation Research Laboratory, Osaka University, Osaka, Japan

<sup>4</sup> Graduate School of Engineering, Osaka University, Osaka, Japan

\*Corresponding authors



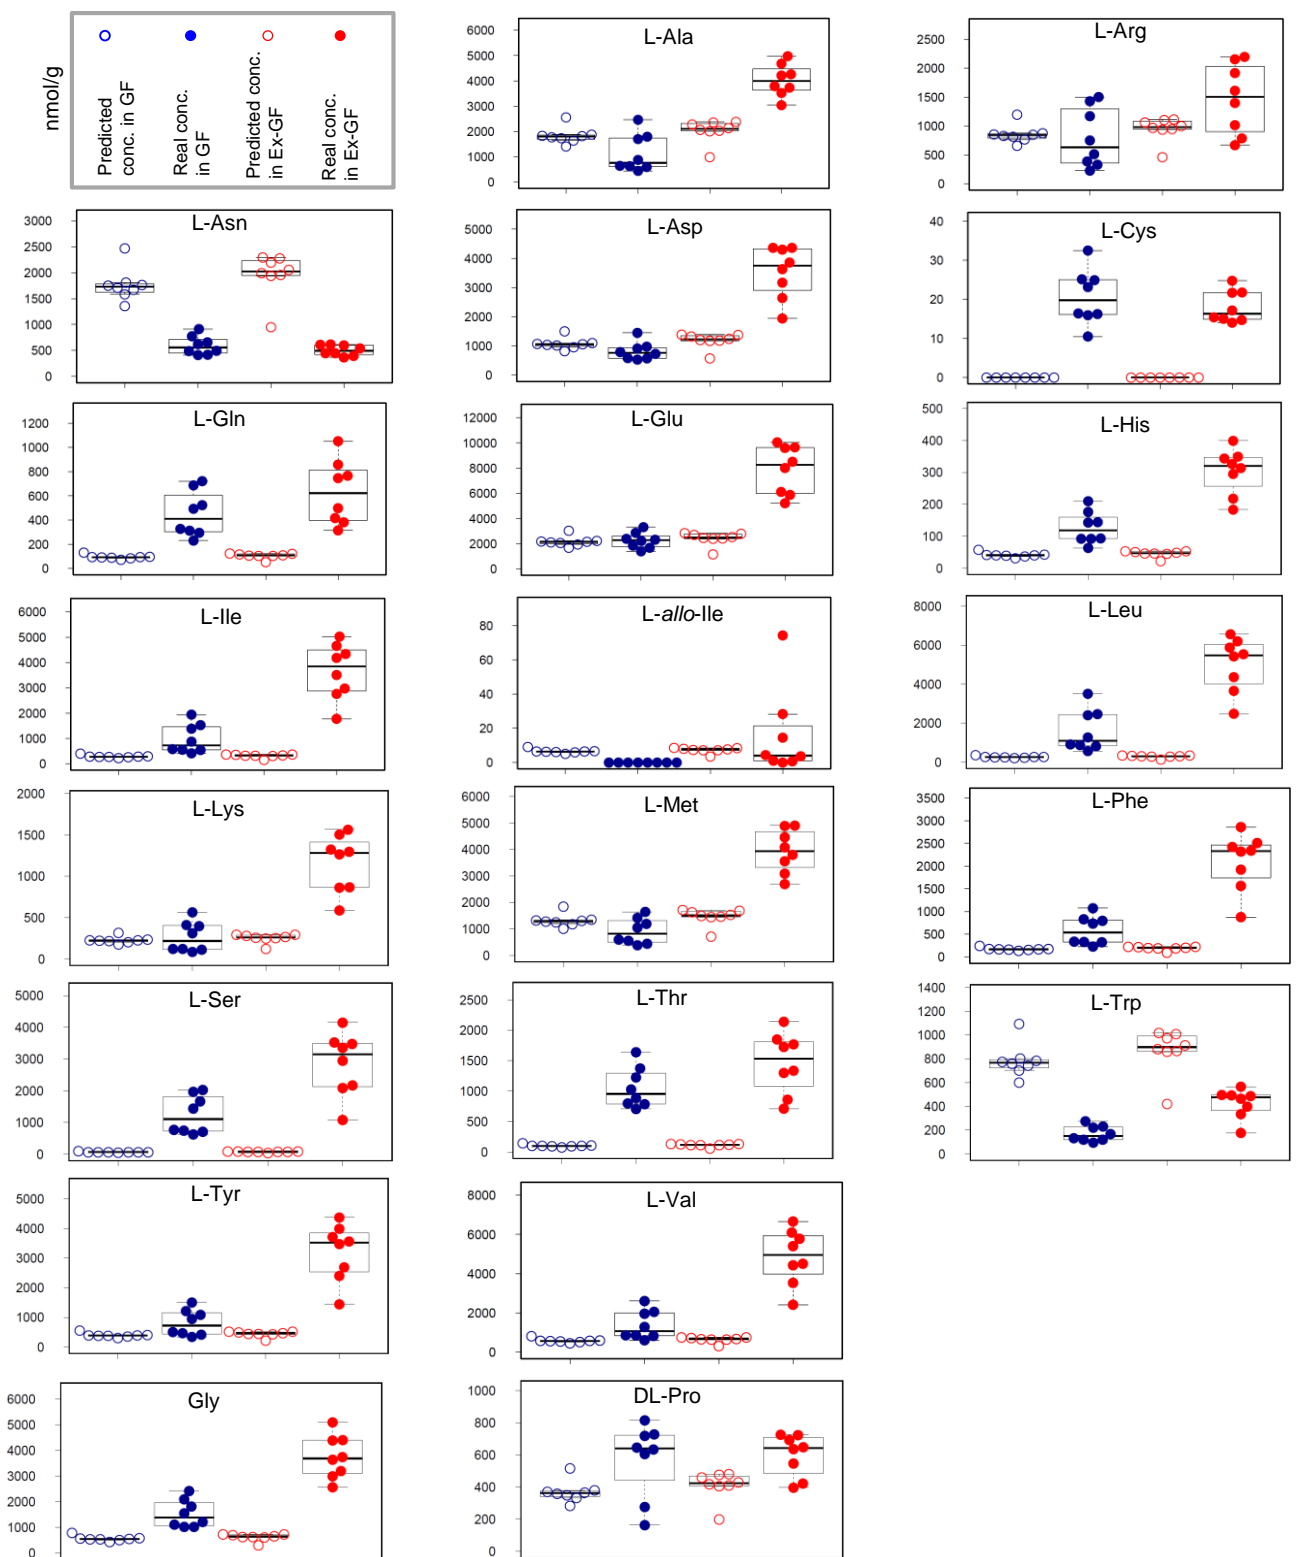

**Supplementary Fig. S2.** Quantitative comparison of L-amino acids between actual concentration in colonic content and estimated concentration when pellets reached the colon in GF mice and Ex-GF mice (nmol/g of feces). Estimated values of pellet L-AAs in the colonic lumen were calculated as follows: estimated values of D-amino acids (nmol/g) = measured concentration in pellet/[pellet solid content (%)/solid content of colonic content (%)]. L-*allo*-Thr was not detected from both colonic content and pellet.

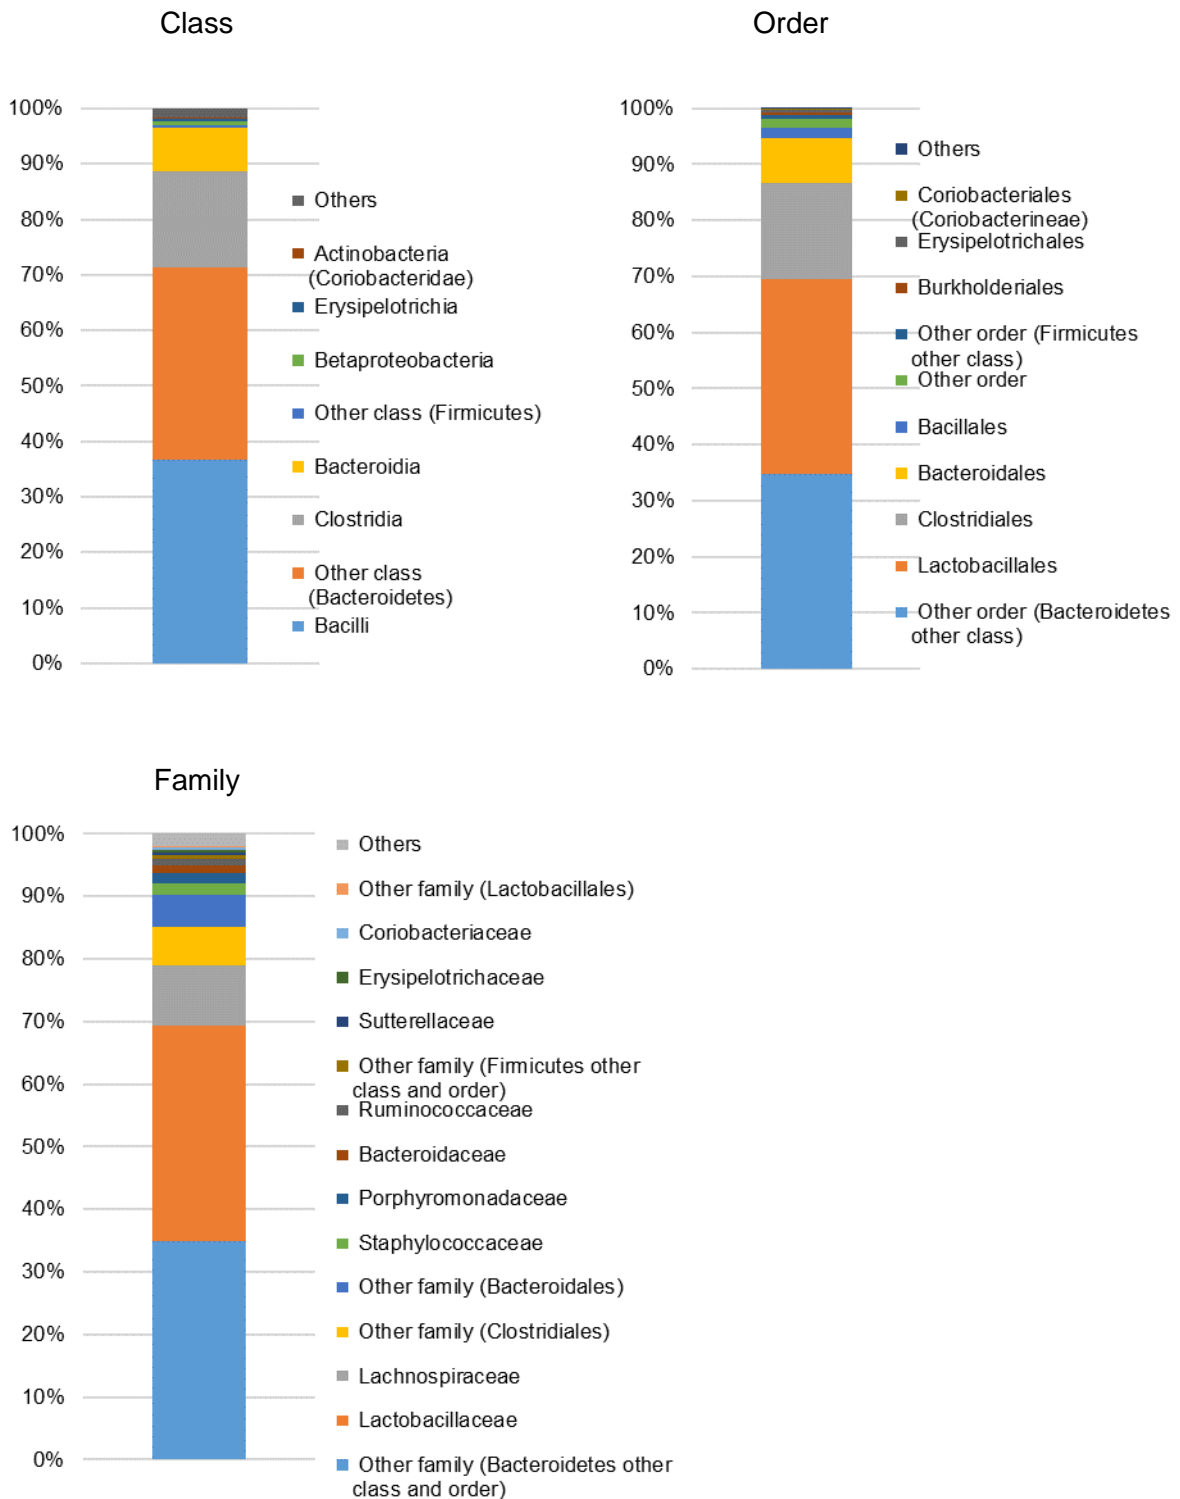

**Supplementary Fig. S3.** Relative abundances of colonic bacteria in Ex-GF mice by 16S rRNA gene amplicon sequencing (Class, Order, and Family). Bacteria with less than 0.1% abundance were included in others. Data of phylum and genus levels are shown in Fig. 2a.

### D-Ala

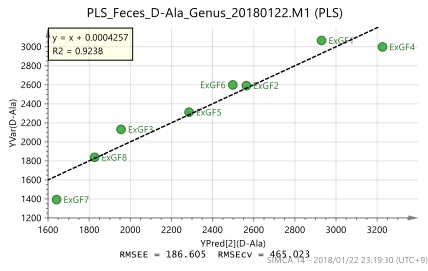

### D-Arg

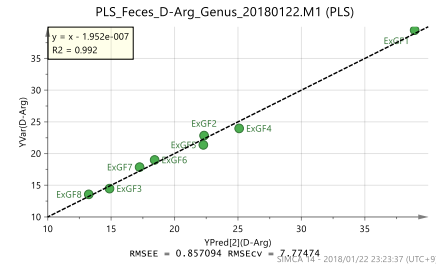

### D-Asp

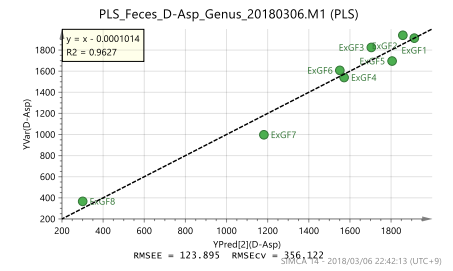

### D-Gln

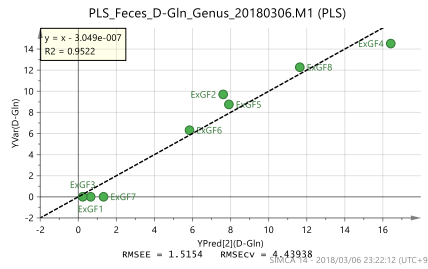

### D-Glu

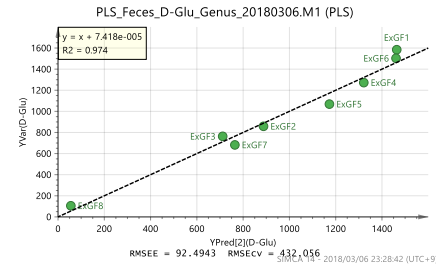

### D-allo-Ile

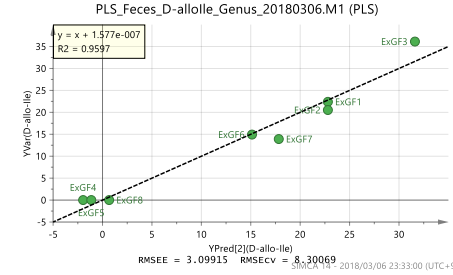

### D-Leu

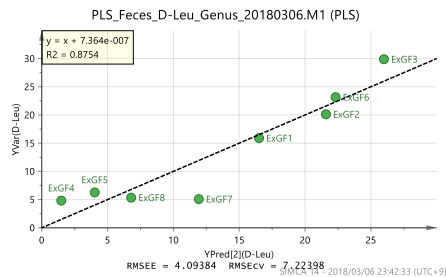

### D-Lys

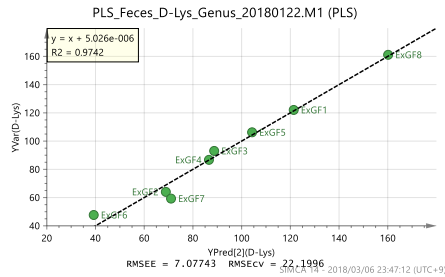

### D-Met

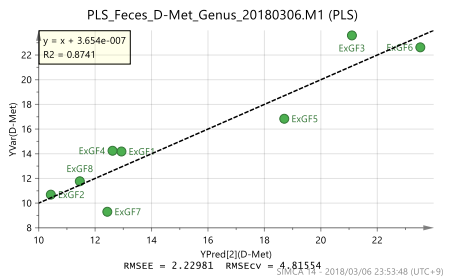

### D-Phe

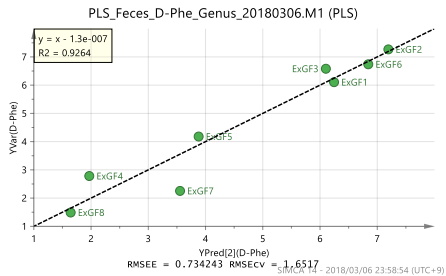

### D-Ser

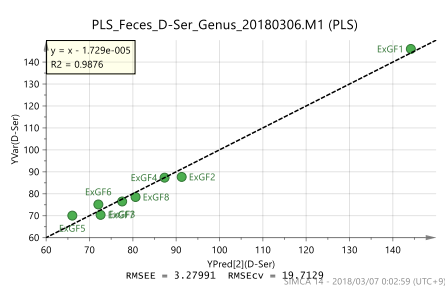

### D-Trp

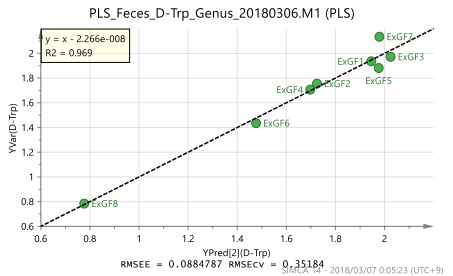

**Supplementary Fig. S4.** The PLS regression lines of 12 D-amino acids that were produced by intestinal bacteria

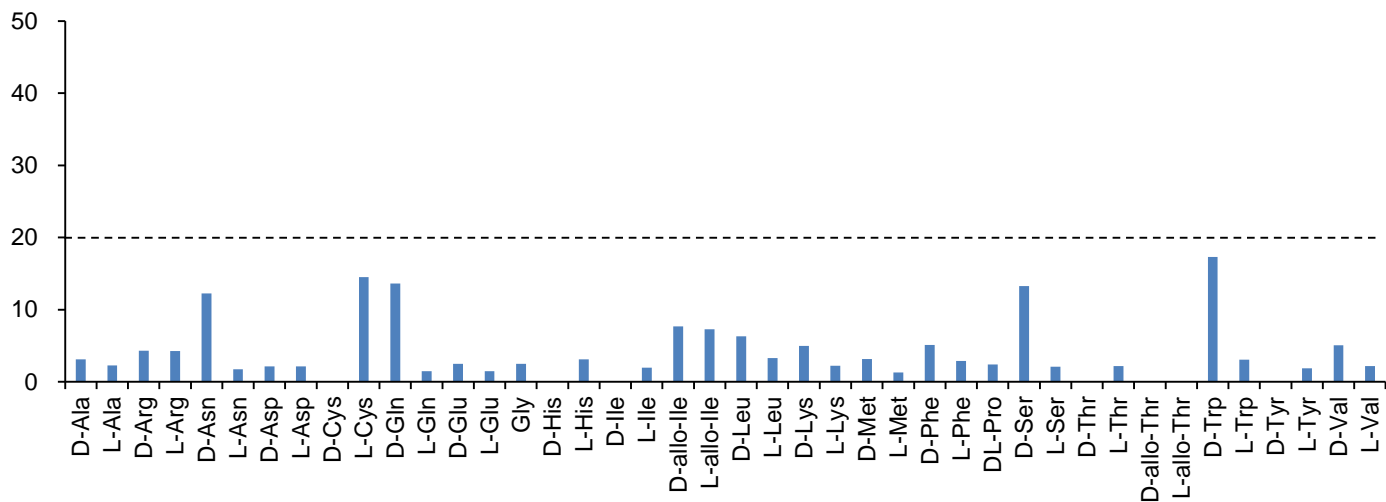

**Supplementary Fig. S5.** Repeatability of peak area (% Relative standard deviation)

Extract of feces from conventional mice (n = 8) were mixed to prepare the pooled quality check samples. Thirty-five chiral AAs were detected from feces, and good repeatability (RSD of the peak area ratio of AAs to <sup>13</sup>C<sub>6</sub>-L-Phe < 20%) was observed in all chiral amino acids.

**Supplementary Table S1.** Concentration of D-amino acid and L-amino acids in the pellet (nmol/g)

|                     | Mean   | SD    |                     | Mean   | SD    |
|---------------------|--------|-------|---------------------|--------|-------|
| D-Ala               | 286.3  | 9.4   | L-Ala               | 5772.3 | 288.6 |
| D-Arg               | 8.2    | 0.5   | L-Arg               | 2695.1 | 15.4  |
| D-Asn               | 22.1   | 1.3   | L-Asn               | 5555.2 | 53.5  |
| D-Asp               | 366.5  | 17.8  | L-Asp               | 3369.6 | 130.4 |
| D-Cys               | ND     |       | L-Cys               | ND     |       |
| D-Gln               | ND     |       | L-Gln               | 296.4  | 9.6   |
| D-Glu               | 90.7   | 0.4   | L-Glu               | 6849.4 | 42.7  |
| D-His               | ND     |       | L-His               | 130.0  | 8.1   |
| D-Ile               | ND     |       | L-Ile               | 895.1  | 49.8  |
| D- <i>allo</i> -Ile | 4.4    | 0.3   | L- <i>allo</i> -Ile | 20.6   | 1.6   |
| D-Leu               | 9.4    | 0.3   | L-Leu               | 832.8  | 53.0  |
| D-Lys               | 7.2    | 1.1   | L-Lys               | 716.7  | 49.2  |
| D-Met               | 4510.3 | 452.4 | L-Met               | 4138.4 | 401.5 |
| D-Phe               | 7.8    | 0.2   | L-Phe               | 540.0  | 21.8  |
| D-Ser               | ND     |       | L-Ser               | 205.9  | 41.5  |
| D-Thr               | ND     |       | L-Thr               | 316.8  | 14.7  |
| D- <i>allo</i> -Thr | ND     |       | L- <i>allo</i> -Thr | ND     |       |
| D-Trp               | 4.5    | 0.3   | L-Trp               | 2466.2 | 139.1 |
| D-Tyr               | ND     |       | L-Tyr               | 1253.8 | 50.1  |
| D-Val               | 19.3   | 0.8   | L-Val               | 1826.7 | 77.4  |
|                     |        |       | DL-Pro              | 1162.8 | 38.2  |
|                     |        |       | Gly                 | 1747.7 | 64.6  |

ND: Not detected

Pellets were measured in triplicates

**Supplementary Table S2.** Solid contents of mice colonic contents

| Mice   | Solid % | Mice  | Solid % |
|--------|---------|-------|---------|
| GF1    | 29.656  | ExGF1 | 32.886  |
| GF2    | 28.766  | ExGF2 | 33.481  |
| GF3    | 29.412  | ExGF3 | 38.250  |
| GF4    | 22.804  | ExGF4 | 36.862  |
| GF5    | 30.407  | ExGF5 | 34.564  |
| GF6    | 41.477  | ExGF6 | 15.909  |
| GF7    | 26.625  | ExGF7 | 38.596  |
| GF8    | 28.105  | ExGF8 | 32.538  |
| Pellet | 93.451  |       |         |



**Supplementary Table S3.** Intestinal absorption and bacterial production of each D-amino acid.

|                     | Intestinal absorption | Bacterial production |
|---------------------|-----------------------|----------------------|
| D-Ala               | +                     | +                    |
| D-Arg               | weak                  | +                    |
| D-Asn               | weak                  | -                    |
| D-Asp               | +                     | +                    |
| D-Cys               | ?                     | -                    |
| D-Gln               | ?                     | +                    |
| D-Glu               | +                     | +                    |
| D-His               | ?                     | weak                 |
| D-Ile               | ?                     | -                    |
| D- <i>allo</i> -Ile | +                     | +                    |
| D-Leu               | +                     | +                    |
| D-Lys               | +                     | +                    |
| D-Met               | +                     | +                    |
| D-Phe               | +                     | +                    |
| D-Ser               | ?                     | +                    |
| D-Thr               | ?                     | -                    |
| D- <i>allo</i> -Thr | ?                     | -                    |
| D-Trp               | -                     | +                    |
| D-Tyr               | ?                     | -                    |
| D-Val               | +                     | -                    |

+, positive; -, negative; weak, Quantities of absorption/production are low.; ?, absorption/production cannot be judged by this study.





**Supplementary Table S6.** Recovery of isotope-labeled L-amino acids (%) by the high-sensitivity LC-MS/MS chiral AA analysis

| Isotope-labeled L-AAs | Recovery rate (%) |
|-----------------------|-------------------|
| L-Ala                 | 98.6              |
| L-Arg                 | 89.5              |
| L-Asp                 | 80.3              |
| L-Glu                 | 89.9              |
| Gly                   | 93.2              |
| L-His                 | 65.3              |
| L-Ile                 | 97.1              |
| L-Leu                 | 98.2              |
| L-Lys                 | 77.7              |
| L-Met                 | 93.7              |
| L-Phe                 | 99.2              |
| DL-Pro                | 96.9              |
| L-Ser                 | 91.4              |
| L-Thr                 | 95.3              |
| L-Tyr                 | 98                |
| L-Val                 | 100               |

Good recovery (80–100%) was obtained for 14 D-AAs except L-His and L-Lys from feces.
